# Supplementary material for: Expression of Human Endogenous Retrovirus-W Including Syncytin-1 in Cutaneous T-Cell Lymphoma
Source: PubMed Central journal article supplement (PMC3788054; doi:10.1371/journal.pone.0076281), 2013-10-01

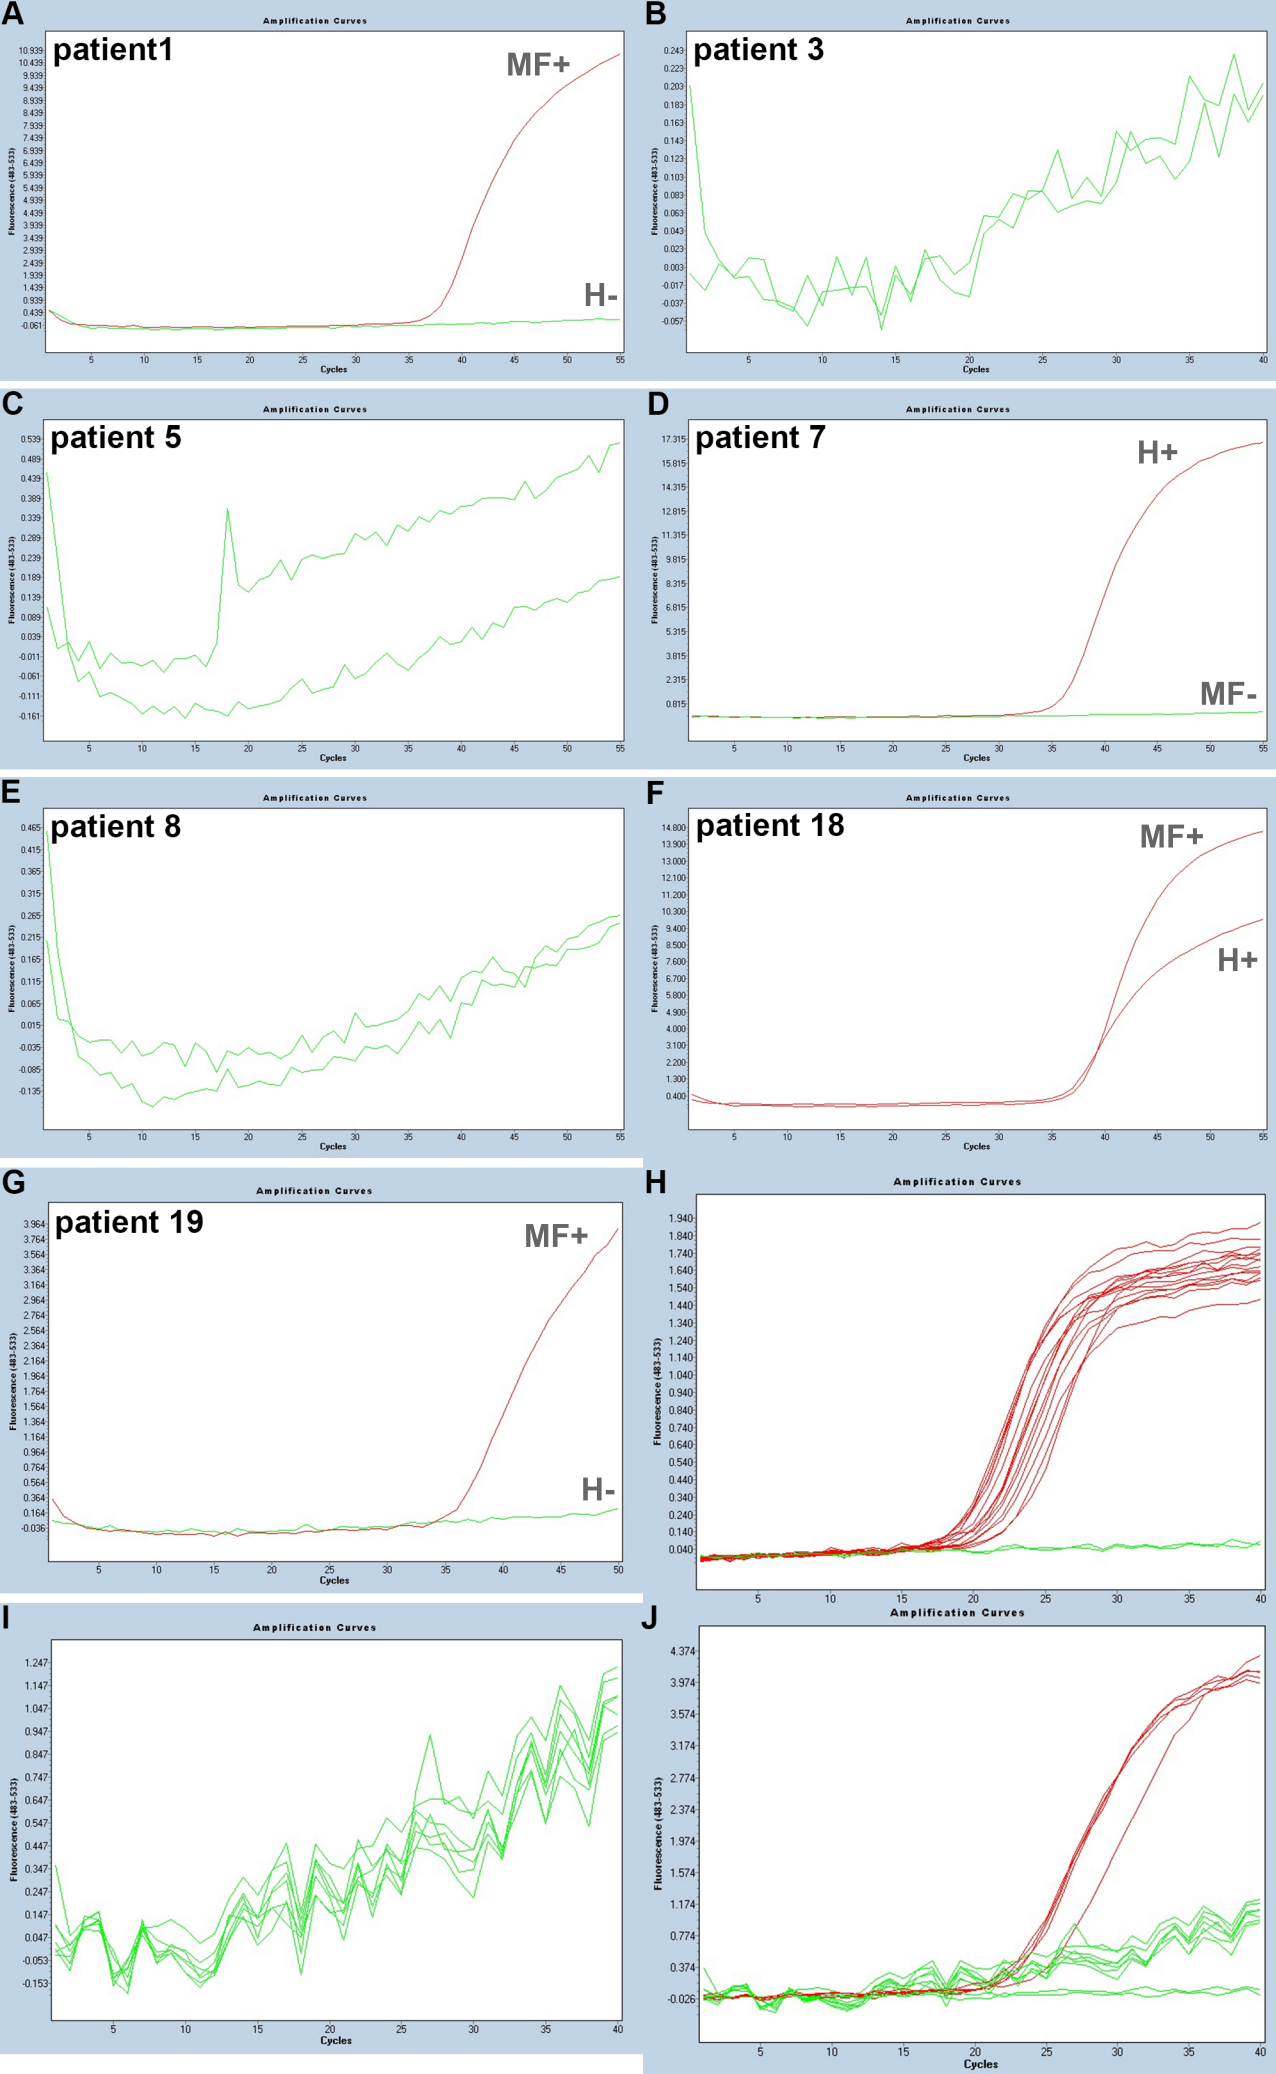

Supplement: pone.0076281.s001.pdf [file pone.0076281.s001.pdf]
