# Supplementary material for: Expression of Human Endogenous Retrovirus-W Including Syncytin-1 in Cutaneous T-Cell Lymphoma
Source: PubMed Central journal article supplement (PMC3788054; doi:10.1371/journal.pone.0076281), 2013-10-01
Supplement: pone.0076281.s002.pdf [file pone.0076281.s002.pdf]

**Table S1.** Comparison of HERV core transcription pattern in human tissues.

| <b>HERV group</b>     | <b>HERV subgroup</b>  | <b>Skin</b> | <b>Urothelium [77]</b> | <b>Brain [60]</b> | <b>Mamma [63]</b> | <b>Kidney [39]</b> |
|-----------------------|-----------------------|-------------|------------------------|-------------------|-------------------|--------------------|
| <b>HERV-FRD</b>       | Seq46                 | -           | -                      | -                 | +                 | -                  |
| <b>HERV-E</b>         | HERV-E4-1             | +           | +                      | +                 | +                 | +                  |
|                       | Seq32                 | -           | -                      | -                 | -                 | +                  |
| <b>HERV-F</b>         | HERV-Fb               | +           | -                      | +                 | +                 | -                  |
| <b>HERV-Rb</b>        | HERV-Rb               | -           | +                      | -                 | -                 | -                  |
| <b>HERV-W</b>         | HERV-W                | +           | -                      | -                 | +                 | +                  |
| <b>ERV9</b>           | Seq63                 | +           | -                      | -                 | -                 | +                  |
|                       | ERV9                  | +           | +                      | +                 | +                 | +                  |
|                       | Seq59                 | +           | -                      | +                 | +                 | +                  |
| <b>HERV-K(HML-2)</b>  | HERV-K10              | -           | -                      | -                 | +                 | +                  |
|                       | HERV-K<br>(HML-2.HOM) | -           | -                      | -                 | +                 | +                  |
|                       | HERV-K(HP1)           | -           | -                      | +                 | +                 | +                  |
|                       | HERV-K(D1.2)          | -           | -                      | +                 | +                 | +                  |
| <b>HERV-K(HML-3)</b>  | Seq26                 | -           | -                      | -                 | -                 | +                  |
|                       | HERV-K(HML-3)         | -           | -                      | -                 | +                 | +                  |
| <b>HERV-K(HML-4)</b>  | HERV-K-T47D           | +           | +                      | +                 | +                 | -                  |
|                       | Seq10                 | -           | -                      | +                 | +                 | -                  |
| <b>HERV-K(HML-6)</b>  | HERV-K(HML-6)         | -           | -                      | +                 | +                 | +                  |
|                       | Seq38                 | -           | -                      | +                 | +                 | -                  |
|                       | Seq56                 | -           | -                      | -                 | +                 | -                  |
| <b>HERV-K(HML-8)</b>  | NMWW3                 | -           | +                      | -                 | -                 | +                  |
| <b>HERV-K(HML-9)</b>  | NMWW9                 | -           | -                      | +                 | -                 | -                  |
| <b>HERV-K(HML-10)</b> | HERV-KC4              | -           | +                      | +                 | -                 | -                  |

“+” indicates transcription and “-” no transcription.
