# Supplementary material for: Expression of Human Endogenous Retrovirus-W Including Syncytin-1 in Cutaneous T-Cell Lymphoma
Source: PubMed Central journal article supplement (PMC3788054; doi:10.1371/journal.pone.0076281), 2013-10-01
Supplement: pone.0076281.s003.pdf [file pone.0076281.s003.pdf]

**Table S2.** Summary of assignment of lesion and non-malignant skin tissue derived cDNA sequences to specific HERV-W loci\*.

| Chr. band | HGNC symbol, aliases             | tr. in PBMC | Location amplicon in hg18 | total cDNAs |               | Patient 1 |               | Patient 6 |               | Patient 5 |               | Patient 12 |               |
|-----------|----------------------------------|-------------|---------------------------|-------------|---------------|-----------|---------------|-----------|---------------|-----------|---------------|------------|---------------|
|           |                                  |             |                           | Lesion      | Non-malignant | Lesion    | Non-malignant | Lesion    | Non-malignant | Lesion    | Non-malignant | Lesion     | Non-malignant |
| 5q21.3    | –                                |             | chr5:107939374-107939968  | 0           | 9             | 0         | 9             | 0         | 0             | 0         | 0             | 0          | 0             |
| 6q21      | –                                | Y           | chr6:106788519-106789158  | 0.00        | 7.69          | 0.00      | 23.68         | 0.00      | 0.00          | 0.00      | 0.00          | 0.00       | 0.00          |
| 7q21.2    | ERVW-1 ERVWE1, <i>Syncytin-1</i> | Y           | chr7:91936835-91937430    | 43          | 26            | 20        | 0             | 13        | 9             | 0         | 11            | 10         | 6             |
| 11p14.3   | –                                |             | chr7:91936835-91937430    | 37.07       | 22.22         | 64.52     | 0.00          | 37.14     | 32.14         | 0.00      | 37.93         | 45.45      | 27.27         |
| 12q13.13  | –                                |             | chr11:22291012-22291605   | 45          | 37            | 6         | 0             | 9         | 16            | 28        | 14            | 2          | 7             |
| 15q21.3   | ERVW-4, C187-23                  | Y           | chr15:53385581-53386171   | 38.79       | 31.62         | 19.35     | 0.00          | 25.71     | 57.14         | 100.00    | 48.28         | 9.09       | 31.82         |
| 17q12     | –                                | Y           | chr17:32765922-32766547   | 2           | 7             | 0         | 7             | 0         | 0             | 0         | 0             | 2          | 0             |
| Xq22.3    | ERVW-2, ERVWE2                   | Y           | chrX:106183224-106183878  | 1.72        | 5.98          | 0.00      | 18.42         | 0.00      | 0.00          | 0.00      | 0.00          | 9.09       | 0.00          |
|           |                                  |             |                           | 1           | 0             | 0         | 0             | 0         | 0             | 0         | 0             | 1          | 0             |
|           |                                  |             |                           | 0.86        | 0.00          | 0.00      | 0.00          | 0.00      | 0.00          | 0.00      | 0.00          | 4.55       | 0.00          |
|           |                                  |             |                           | 6           | 7             | 0         | 0             | 6         | 2             | 0         | 4             | 0          | 1             |
|           |                                  |             |                           | 5.17        | 5.98          | 0.00      | 0.00          | 17.14     | 7.14          | 0.00      | 13.79         | 0.00       | 4.55          |
|           |                                  |             |                           | 18          | 31            | 5         | 22            | 6         | 1             | 0         | 0             | 7          | 8             |
|           |                                  |             |                           | 15.52       | 26.50         | 16.13     | 57.89         | 17.14     | 3.57          | 0.00      | 0.00          | 31.82      | 36.36         |
|           |                                  |             |                           | 1           | 0             | 0         | 0             | 1         | 0             | 0         | 0             | 0          | 0             |
|           |                                  |             |                           | 0.86        | 0.00          | 0.00      | 0.00          | 2.86      | 0.00          | 0.00      | 0.00          | 0.00       | 0.00          |
|           |                                  |             |                           | <b>116</b>  | <b>117</b>    | <b>31</b> | <b>38</b>     | <b>35</b> | <b>28</b>     | <b>28</b> | <b>29</b>     | <b>22</b>  | <b>22</b>     |

\* Chr. band: chromosomal location of the transcribed HERV-W locus

HGNC symbol, aliases: Human Gene Nomenclature Committee approved HERV-W locus symbol if HERV locus has been identified as transcribed before and has been submitted as such to HGNC.

tr. in PBMC: "Y" indicates that that HERV-W locus has previously been identified as transcribed in PBMC [59].

Location amplicon in hg18\*: nucleotide position of RT-PCR amplicon on the respective human chromosome based on the hg18/March 2006 human reference sequence (NCBI Build 36.1).

total cDNAs: total number of cDNAs generated and assigned to the various HERV-W loci for "lesion tissue" and "non-malignant tissue". Numbers are also given in percentages based on the total number of analysed cDNAs (bottom of row) each. The following columns further detail results for the four different patients as described for "total cDNAs"
